# Supplementary material for: Quantification of humic acids in surface water: effects of divalent cations, pH, and filtration
Source: Royal Society of Chemistry journal article supplement (doi:10.1039/b811942b), 2008-11-28
Supplement: b811942b.pdf [file b811942b.pdf]

### Simple mathematical model

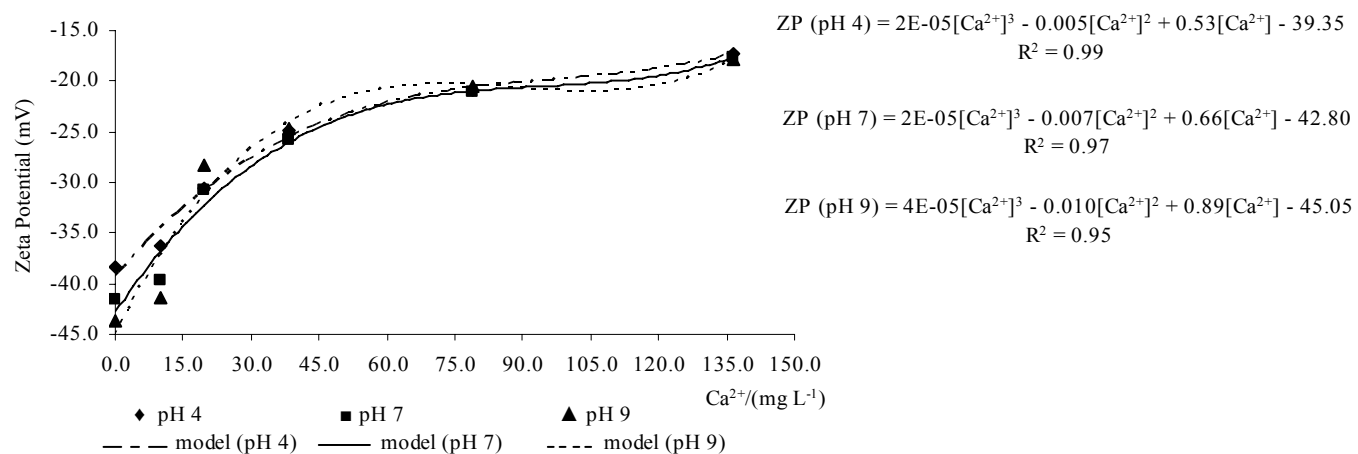

**Fig. 1** Zeta potential of the HA suspension ( $10 \text{ mg L}^{-1}$  carbon) as a function of pH at several calcium concentrations

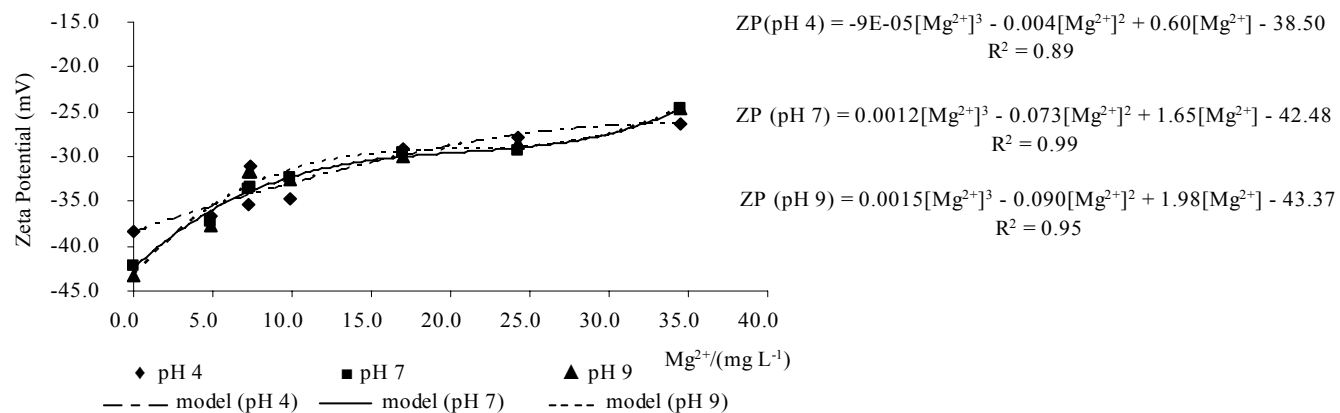

**Fig. 2** Zeta potential of the HA suspension ( $10 \text{ mg L}^{-1}$  carbon) as a function of pH at several magnesium concentrations

### Empirical adsorption models

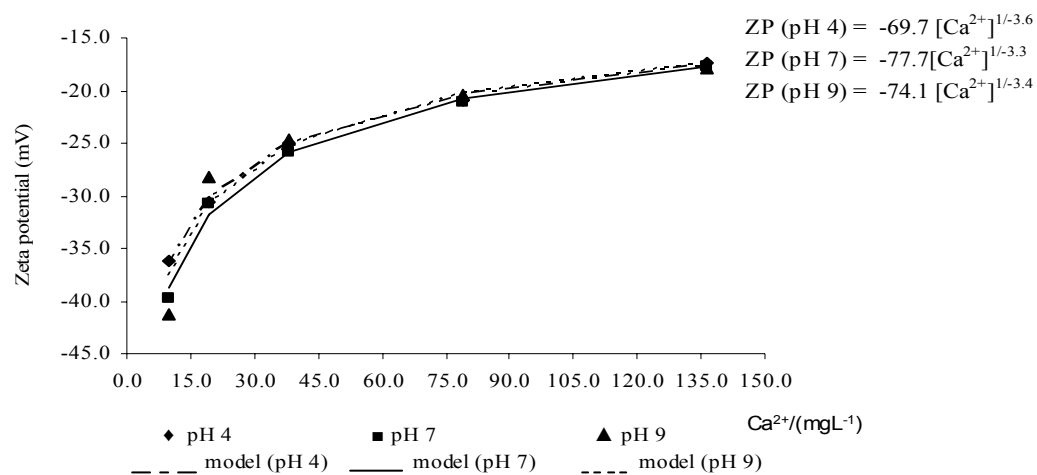

Fig. 3 Zeta potential of the HA suspension (10 mg L<sup>-1</sup> carbon) as a function of pH at several calcium concentrations

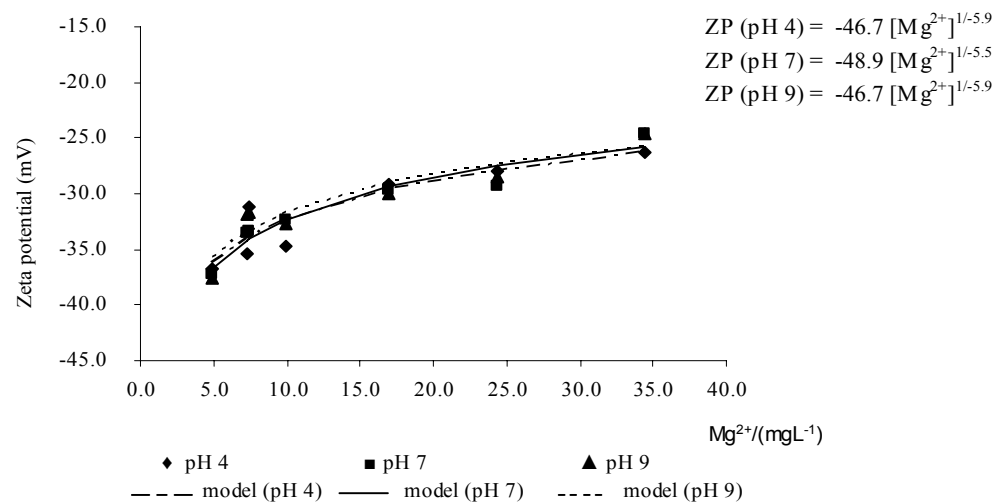

Fig. 4 Zeta potential of the HA suspension (10 mg L<sup>-1</sup> carbon) as a function of pH at several magnesium concentrations

## References

- 1 F. Claret, T. Schäfer, A. Bauer and G. Buckau, *Sci. Total Environ.*, 2003, **317**, 189.
- 2 C. MacLeod and P. H. Whitfield, *B.C. Northwest Science*, 1996, **70**(1), 55-65.
- 3 S. J. Markich and P. L. Brown, *Sci. Total Environ.*, 1998, **217**, 201.
- 4 M. Olías, J. M. Nieto, A. M. Sarmiento, J. C. Cerón and C. R. Cánovas, *Sci. Total Environ.*, 2004, **333**, 267.
- 5 D. Gan, S. I. Kotob and D. S. Walia, *Annals of Environmental Science*, 2007, **1**, 11.
- 6 T. Anđelković, J. Perović, M. Purenović and D. Anđelković, *Facta Universitatis Series: Physics, Chemistry and Technology*, 2004, **3**(1), 79.
- 7 R. von Wandruszka, C. Ragle, R. Engebretson, *Talanta*, 1997, **44**, 805.
- 8 A. K. Pandey, S. D. Pandey, and V. Misra, *Ecotoxicology and Environmental Safety*, 2000, **47**, 195.
- 9 R. D. Guy, C. L. Chakrabarti, L. L. Schramm, *Can. J. Chem.*, 1975, **53**, 661.
- 10 M. Arias, M. T. Barral, J. Silva Carvalhal, J. C. Mejuto and D. Rubinos, *Clay Minerals*, 2004, **39**, 35.
- 11 D. G. Kinniburgh, W. H. van Riemsdijk, L. K. Koopal, M. Borkovec, M. F. Benedetti and M. J. Avena, *Colloids and Surfaces*, 1999, **151**, 147.
- 12 P. Merdy, S. Huclier and L. K. Koopal, *Environmental Science & Technology*, 2006, **40** (24), 7459.
